# Supplementary material for: Viability and Resilience of Languages in Competition
Source: PLOS journal article supplement (doi:10.1371/journal.pone.0008681), 2010-01-25
Supplement: S2 (10.1371/journal.pone.0008681.s002) [file journal.pone.0008681.s002]

## Appendix S2. Theoretical bounds of the Abrams-Strogatz model (system Eqn 9) associated with the viability constraint set Eqn 10

We remind that the dynamics  $(\frac{d\Sigma}{dt}, \frac{ds}{dt}) = F(\Sigma, s, u)$  are defined by:

$$\begin{cases} \frac{d\Sigma}{dt} = F(\Sigma, s, u) = (1 - \Sigma)\Sigma (\Sigma^{a-1}s - (1 - \Sigma)^{a-1}(1 - s)) \\ \frac{ds}{dt} = u \\ u \in [-0.1, 0.1] \end{cases} \quad (1)$$

and that  $K = [\underline{\Sigma}, \bar{\Sigma}] \times [0, 1]$  is the viability constraint set.

We aim at finding explicit formulas for  $Viab_F(K)$ , the viability kernel under the dynamics  $F$ . We first introduce two functions  $f_1$  and  $f_2$  and then prove that these functions enable us to define a set which is  $Viab_F(K)$ .

### Definition of $f_1$ and $f_2$

- Let  $C_1 = \{(\Sigma(t), s(t)), t \in [0; +\infty[ \}$  satisfying

$$\begin{cases} \frac{d\Sigma(t)}{dt} = -(1 - \Sigma(t))\Sigma(t) (\Sigma^{a-1}(t)s(t) - (1 - \Sigma(t))^{a-1}(1 - s(t))) \\ \frac{ds(t)}{dt} = 0.1 \\ \Sigma_1 = 0.8 \text{ and } s_1(0) = s_1 = \frac{0.2^{a-1}}{0.8^{a-1} + 0.2^{a-1}} \end{cases} \quad (2)$$

where  $\Sigma(t)$  is the density of  $A$ -speakers at time  $t$  and  $s(t)$  the prestige at time  $t$ .

We have  $C_1 = \{(\Sigma, s) \in \mathbb{R}^2 | \Sigma = f_1(s), s \geq s_1\}$  with:

$$f_1(s) = \Sigma_1 + \int_{s_1}^s -(1 - f_1(\tilde{s}))f_1(\tilde{s})(f_1(\tilde{s})^{a-1}\tilde{s} - (1 - f_1(\tilde{s}))^{a-1}(1 - \tilde{s}))d\tilde{s}. \quad (3)$$

Note that  $f_1'(s_1) = 0$  and that  $f_1''(s) < 0$  when  $f_1(s) \in [0.2, 0.8]$  and  $f_1'(s) = 0$ . Consequently,  $f_1'(s) < 0$  when  $s > s_1$  and  $f_1(s) \in [0.2, 0.8]$ .

- Let  $C_2 = \{(\Sigma(t), s(t)), t \in [0; +\infty[ \}$  satisfying:

$$\begin{cases} \frac{d\Sigma(t)}{dt} = -(1 - \Sigma(t))\Sigma(t) (\Sigma^{a-1}(t)s(t) - (1 - \Sigma(t))^{a-1}(1 - s(t))) \\ \frac{ds(t)}{dt} = -0.1 \\ \Sigma_2 = 0.2 \text{ and } s_2(0) = s_2 = \frac{0.8^{a-1}}{0.2^{a-1} + 0.8^{a-1}} \end{cases} \quad (4)$$

We have  $C_2 = \{(\Sigma, s) \in \mathbb{R}^2 | \Sigma = f_2(s), s \leq s_2\}$  with:

$$f_2(s) = \Sigma_2 - \frac{1}{0.1} \int_{s_2}^s -(1 - f_2(\tilde{s}))f_2(\tilde{s})(f_2(\tilde{s})^{a-1}\tilde{s} - (1 - f_2(\tilde{s}))^{a-1}(1 - \tilde{s}))d\tilde{s}. \quad (5)$$

Note that  $f_2'(s_2) = 0$  and that  $f_2''(s) > 0$  when  $f_2(s) \in [0.2, 0.8]$  and  $f_2'(s) = 0$ . Consequently,  $f_2'(s) < 0$  when  $s < s_2$  and  $f_2(s) \in [0.2, 0.8]$ .

## Definition of $Viab_F(K)$ and proofs

**Theorem .** Let  $E \subset K$  the subset defined by:

$$\left\{ (\Sigma, s) \in K \quad \left| \quad \begin{array}{l} \Sigma \leq f_1(s) \text{ if } s \geq s_1(0) \\ \Sigma \geq f_2(s) \text{ if } s \leq s_2(0) \end{array} \right. \right\} \quad (6)$$

then we have  $E = Viab_F(K)$ .

*PROOF PART 1: E is a viability domain: all the points inside E are viable.*

We have to prove that for all  $(\Sigma, s) \in \partial E$  (where  $\partial E$  is the boundary of the subset  $E$ ), there exists at least one control  $u$  such that  $F(\Sigma, s, u)$  belongs to the tangent cone of  $E$  at the point  $(\Sigma, s)$ , denoted  $T_E(\Sigma, s)$ .

Let  $(\Sigma, s) \in \partial E$ ,

- if  $\Sigma = 0.2$ , as  $f'_2(s) < 0$  when  $s < s_2$  and  $f_2(s) \in [0.2, 0.8]$ , necessarily  $s \geq s_2$ . Moreover,  $s \leq \min(1, f_1^{-1}(0.2))$ . If  $s = s_2$ ,  $F(\Sigma, s, 0) = 0 \in T_E(\Sigma, s)$ , if  $s_2 < s < \min(1, f_1^{-1}(0.2))$ ,  $F(\Sigma, s, u) \in T_E(\Sigma, s)$  for all  $u \in [-0.1, 0.1]$ .
- if  $s = 1$ , or if  $(\Sigma, s) \in C_1$ ,  $\Sigma < 0.8$ ,  $F(\Sigma, s, -0.1) \in T_E(\Sigma, s)$ .
- if  $\Sigma = 0.8$ , as  $f'_1(s) < 0$  when  $s > s_1$  and  $f_1(s) \in [0.2, 0.8]$ , necessarily  $s \leq s_1$ . Moreover,  $s \geq \max(1, f_2^{-1}(0.8))$ . If  $s = s_1$ ,  $F(\Sigma, s, 0) = 0 \in T_E(\Sigma, s)$ , if  $\max(1, f_2^{-1}(0.8)) < s < s_1$ ,  $F(\Sigma, s, u) \in T_E(\Sigma, s)$  for all  $u \in [-0.1, 0.1]$ .
- if  $s = 0$ , or if  $(\Sigma, s) \in C_2$ ,  $\Sigma > 0.2$ ,  $F(\Sigma, s, +0.1) \in T_E(\Sigma, s)$ .

□

*PROOF PART 2: E is the largest viability domain.*

Let's first introduce some notations:

- Let  $(\bar{\Sigma}, \bar{s}) \in K \setminus E$ . We can suppose  $\bar{s} > f_1^{-1}(\bar{\Sigma})$ . The argument is the same if  $\bar{s} > f_2^{-1}(\bar{\Sigma})$ .
- Let  $(\bar{\Sigma}(t), \bar{s}(t)), t \in [0; +\infty[$  an evolution starting from  $(\bar{\Sigma}, \bar{s})$  and satisfying Eqn 1.
- Let  $(\Sigma^*(t), s^*(t)), t \in [0; +\infty[$  defined by:

$$\begin{cases} \frac{d\Sigma^*(t)}{dt} = (1 - \Sigma^*(T))\Sigma^*(T) (\Sigma^{*a-1}(T)s^*(T) - (1 - \Sigma^*(t))^{a-1}(1 - s^*(t))) \\ \frac{ds^*(t)}{dt} = -0.1 \\ \Sigma^*(0) = \bar{\Sigma} \text{ and } s^*(0) = f_1^{-1}(\bar{\Sigma}) \end{cases} \quad (7)$$

Then,  $(\Sigma^*(0), s^*(0)) \in C_1$  and there exists  $T$  such that  $(\Sigma^*(T), s^*(T)) = (\Sigma_1, s_1)$  and  $(\Sigma^*(t), s^*(t)) \in C_1, \forall t \in [0; T]$ .

We have  $\bar{s}(0) > s^*(0)$  and as  $s^{*'}(t) = -0.1$  and  $\bar{s}'(t) = u \in [-0.1, 0.1], \forall t \in [0; T], \bar{s}(t) > s^*(t)$ . Furthermore,  $\bar{\Sigma}(0) = \Sigma^*(0)$  and  $\frac{d\bar{\Sigma}}{dt}(0) = F(\bar{\Sigma}(0), \bar{s}(0)) > F(\Sigma^*(0), s^*(0)) = \frac{d\Sigma^*}{dt}(0)$  so there exists  $\hat{t} > 0$  such that  $\bar{\Sigma}_A(t) > \Sigma_A^*(t)$  for all  $t \in ]0, \hat{t}]$ .

Assume that there exists  $\tilde{t} \in ]\hat{t}, T]$  such that  $\bar{\Sigma}_A(t) > \Sigma_A^*(t)$  for all  $t \in ]\hat{t}, \tilde{t}]$  and  $\bar{\Sigma}_A(\tilde{t}) = \Sigma_A^*(\tilde{t})$ . Then  $\frac{d\bar{\Sigma}_A}{d}(\tilde{t}) \leq \frac{d\Sigma_A^*}{d}(\tilde{t})$  but  $\frac{d\bar{\Sigma}_A}{d}(\tilde{t}) = F(\bar{\Sigma}_A(\tilde{t}), \bar{s}(\tilde{t})) > F(\Sigma_A^*(\tilde{t}), s^*(\tilde{t})) = \frac{d\Sigma_A^*}{d}(\tilde{t})$  since  $\bar{\Sigma}_A(\tilde{t}) = \Sigma_A^*(\tilde{t})$  and  $\bar{s}(\tilde{t}) > s^*(\tilde{t})$ . Hence the contradiction, so  $\forall t \in [0, T], \bar{\Sigma}_A(t) > \Sigma^*(t)$ .

Consequently,  $(\bar{\Sigma}_A(T), \bar{s}(T)) \notin K$  and  $(\bar{\Sigma}_A(T), \bar{s}(T)) \notin Viab_F(K)$ .

□
